# Supplementary material
Source: Springer Nature journal article supplement (https://www.springermedizin.de/resource/supplementary/13054_2011_9911_MOESM8_ESM.pdf/9708506)
Supplement: MOESM8 [file 9708506]

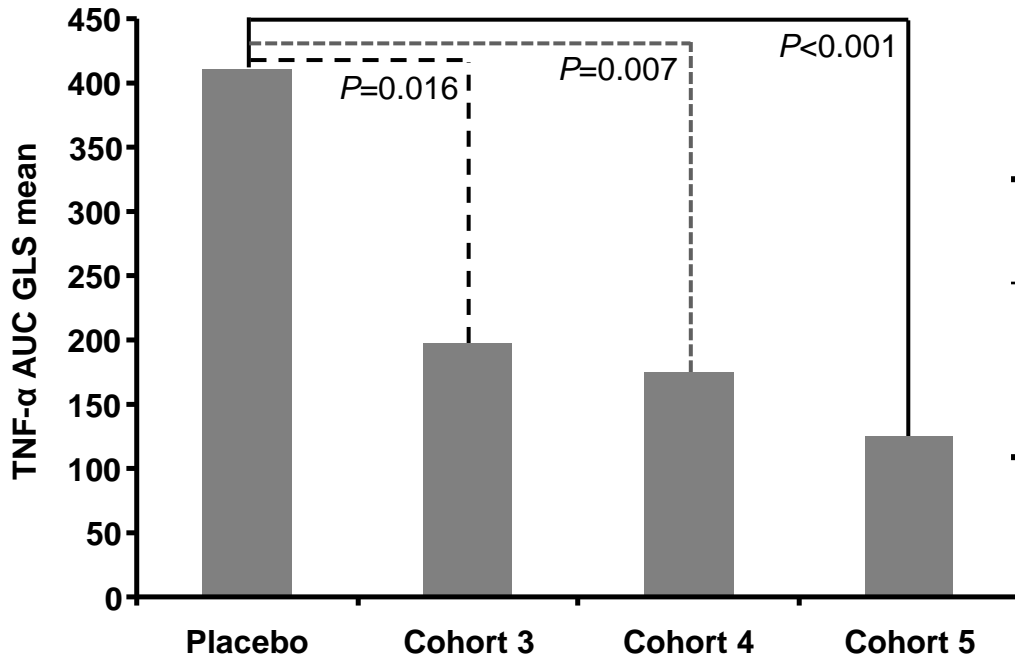

| vs placebo | % reduction estimate (95% CI) |
|------------|-------------------------------|
| Cohort 3   | 52.0 (13.7, 73.3)             |
| Cohort 4   | 57.3 (22.1, 76.6)             |
| Cohort 5   | 69.7 (45.2, 83.2)             |

AUC, area under the concentration–time curve; CI, confidence interval; GLS, geometric least squares
